# Supplementary material
Source: PubMed Central journal article supplement (PMC4207385)
Supplement: supp_db14-0549_DB140549SupplementaryData.pdf [file supp_db14-0549_DB140549SupplementaryData.pdf]

SUPPLEMENTARY DATA

**Supplementary Figure 1.** Quantification of CD4+ and CD11c+ cells in pancreatic tissue sections. Frozen pancreas sections from T1D donors (A–D) were stained for insulin and/or glucagon and CD4 (A, B) or CD11c (C, D). Images C and D were acquired using a BIOREVO BZ-9000 slide scanner system (Keyence, Osaka, Japan). Bars, 50  $\mu$ m.

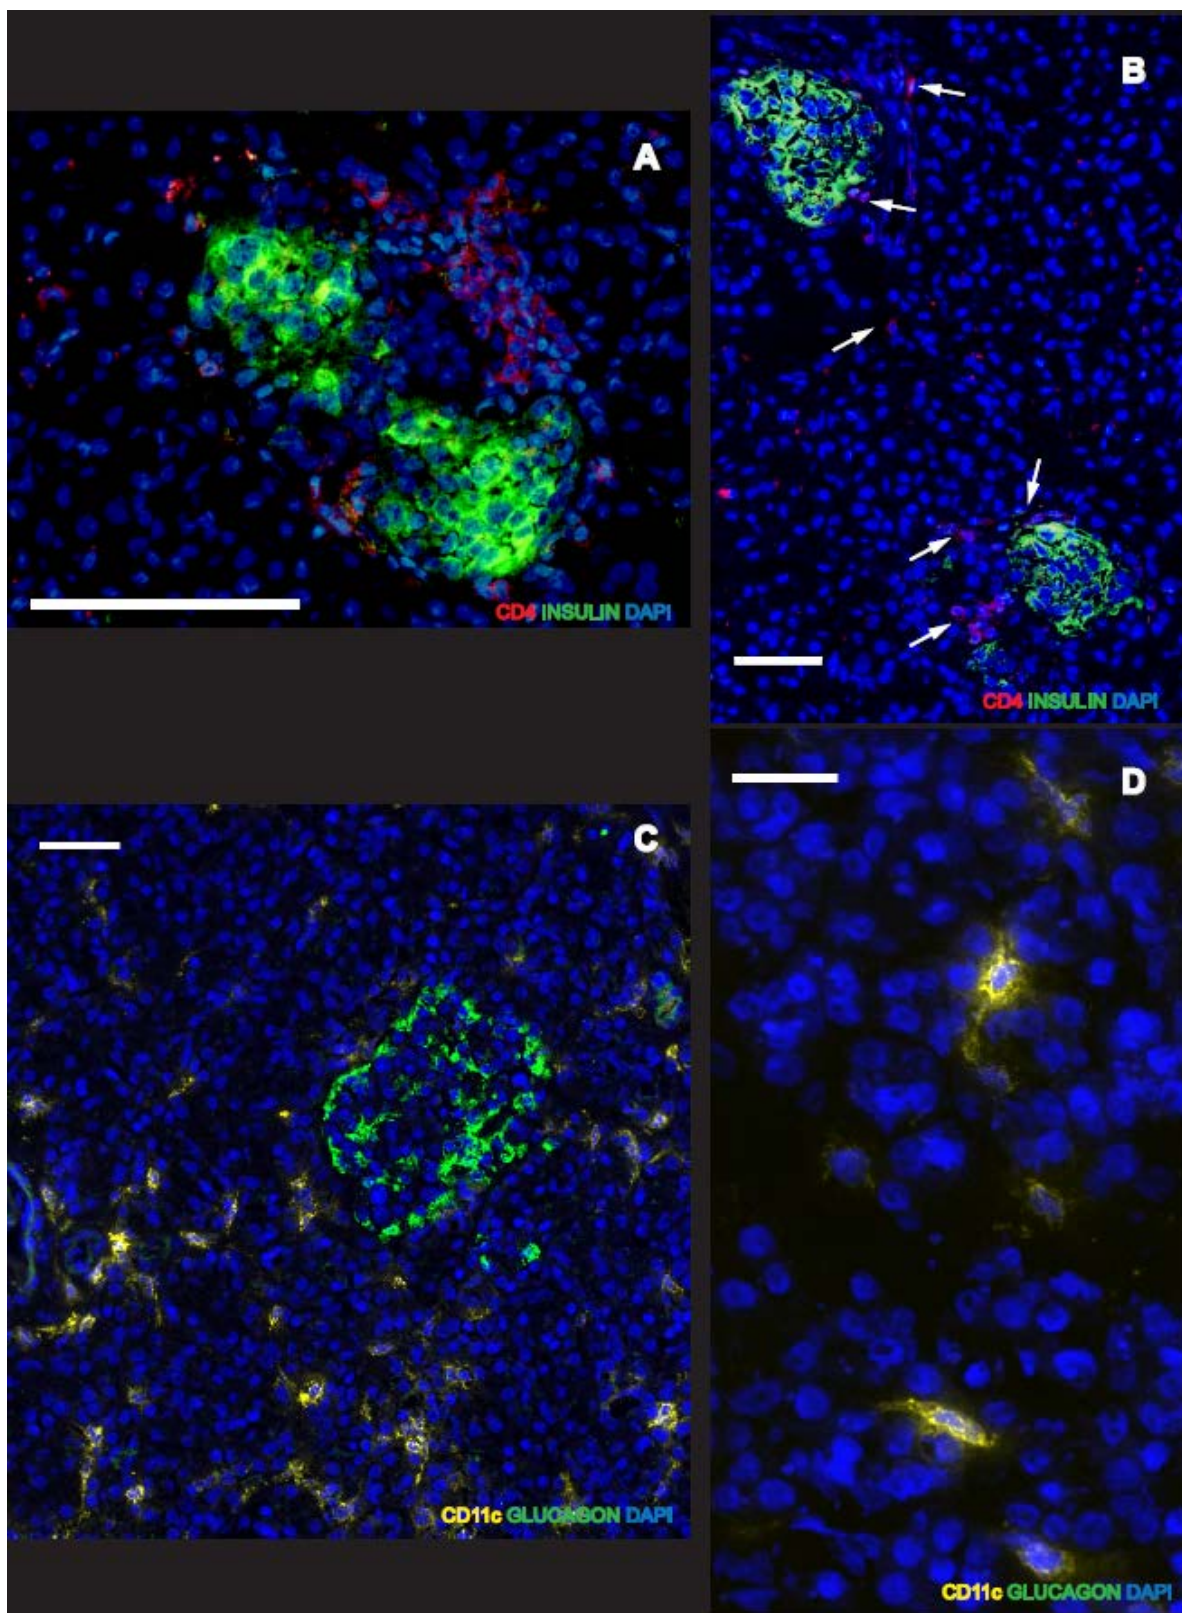

## SUPPLEMENTARY DATA

**Supplementary Table 1.** Extended donor information. Autoab Pos, autoantibody positive donor. T1D, type 1 diabetic donor. T2D, type 2 diabetic donor. Age and duration of disease are expressed in years unless otherwise indicated; BMI, body mass index; Cpeptide is expressed in ng/ml; time ICU, time spent in the Intensive Care Unit; ZnT8A, zinc transporter 8 autoantibodies; IA-2A, intracytoplasmic domain of the tyrosine phosphatase IA-2 autoantibodies; mIAA, micro assay for insulin autoantibodies; GADA, glutamic acid decarboxylase 65 autoantibodies. – indicates not determined or not available.

SUPPLEMENTARY DATA

| nPOD ID | Donor Type  | Gender | Age  | BMI  | Duration | C-Peptide | Time ICU | Cell type analyzed | Regions analyzed | Clinical History    | Histopathology by nPOD                                                                                                                                                             |
|---------|-------------|--------|------|------|----------|-----------|----------|--------------------|------------------|---------------------|------------------------------------------------------------------------------------------------------------------------------------------------------------------------------------|
| 6044    | Autoab Pos  | Male   | 41.4 | 27.4 | -        | 13.55     | -        | CD8                | Body, Tail       | GADA+               | Ins+/Gluc+ islets, normal sizes and distribution                                                                                                                                   |
| 6123    | Autoab Pos  | Female | 23.2 | 17.6 | -        | 2.01      | 4        | CD8, CD4, CD11c    | Head, Body, Tail | GADA+               | Ins+ islets, various sizes                                                                                                                                                         |
| 6147    | Autoab Pos  | Female | 23.8 | 32.9 | -        | 3.19      | 3        | CD8, CD11c         | Body             | GADA+               | Ins+/Gluc+ normal islets. No infiltrates                                                                                                                                           |
| 6151    | Autoab Pos  | Male   | 30   | 24.2 | -        | 5.49      | 2        | CD8, CD4, CD11c    | Head             | GADA+               | Ins+/Gluc+ islets. No infiltrates observed                                                                                                                                         |
| 6154    | Autoab Pos  | Female | 48.5 | 24.5 | -        | <0.05     | 4        | CD8                | Head, Body, Tail | GADA+               | Ins+ (very weak)/Gluc+ islets, plentiful. Very mild, multifocal CD3+ infiltrates acinar regions and interstitial. Moderate fatty infiltrates acinar regions                        |
| 6156    | Autoab Pos  | Male   | 40   | 19.9 | -        | 13.34     | 3        | CD8, CD4, CD11c    | Head, Body, Tail | GADA+               | Ins+/Gluc+ normal islets. Very mild peri-duct and acinar infiltrates CD3+                                                                                                          |
| 6158    | Autoab Pos  | Male   | 40.3 | 29.7 | -        | 0.51      | 3        | CD8, CD4, CD11c    | Head, Body, Tail | GADA+ mIAA+         | Ins+/Gluc+. Exocrine atrophy, mild. Focal mild chronic pancreatitis                                                                                                                |
| 6167    | Autoab Pos  | Male   | 37   | 26.3 | -        | 5.43      | 3        | CD8                | Head, Body, Tail | IA-2A+ ZnT8A+       | Ins+/Gluc+ islets, normal. No infiltrates. Mild acinar fat                                                                                                                         |
| 6170    | Autoab Pos  | Female | 34.4 | 36.9 | -        | 4.29      | 7        | CD8, CD4, CD11c    | Head             | GADA+, Hypertension | Ins+/Gluc+ islets. Slight acinar atrophy and fatty replacement. No infiltrates other than 1 foci of chronic pancreatitis                                                           |
| 6171    | Autoab Pos  | Female | 4.3  | 14.8 | -        | 8.95      | 4        | CD8, CD4, CD11c    | Body, Tail       | GADA+               | Ins+/Gluc+ islets. No infiltrates other than very mild pancreatitis                                                                                                                |
| 6181    | Autoab Pos  | Male   | 31.9 | 21.9 | -        | 0.06      | 2        | CD8                | Head, Body, Tail | GADA+               | Ins+/Gluc+ islets, normal. No infiltrates.                                                                                                                                         |
| 6184    | Autoab Pos  | Female | 47.5 | 27   | -        | 3.42      | 6        | CD8                | Head, Body, Tail | GADA+               | Ins+/Gluc+ islets, normal. Very mild CD3 infiltrate in acinar region.                                                                                                              |
| 6197    | Autoab Pos  | Male   | 22   | -    | -        | 17.48     | 3        | CD8, CD4, CD11c    | Head, Body, Tail | GADA+ IA-2A+        | Ins+/Gluc+ islets, plentiful. insulinitis (rare). Islet hyperemia. Mild, multifocal chronic pancreatitis.                                                                          |
| 6213    | Autoab Pos  | Female | 24   | 39.4 | -        | 11.54     | 2        | CD8, CD4, CD11c    | Body             | -                   | Ins+/Gluc+. Mild fibrosis and mild. Infrequent mild islet hypertrophy (large islets). Fatty infiltrate acinar regions mild to moderate depending on lobule. No acute pancreatitis. |
| 6024    | No diabetes | Male   | 21   | 27.8 | -        | 3.52      | -        | CD8                | Tail             | Negative            | Normal islets                                                                                                                                                                      |
| 6073    | No diabetes | Male   | 19.2 | 36   | -        | 0.69      | 3        | CD8, CD4, CD11c    | Tail             | Negative            | Ins+/Gluc+ islets; mild, multifocal parenchymal mixed infiltrate. Endocrine staining intensity weaker than normal.                                                                 |
| 6075    | No diabetes | Male   | 16   | 14.9 | -        | 2.94      | 5        | CD8                | Tail             | Negative            | Normal islet morphologies and beta/alpha cell distributions. No islet infiltrates though mild, multi focal CD3+ infiltrates in acinar and ducts.                                   |
| 6091    | No diabetes | Male   | 27.1 | 35.6 | -        | 7.71      | -        | CD8                | Body, Tail       | Negative            | Normal islets. Degree of fatty infiltrate moderate. No infiltrates identified.                                                                                                     |
| 6095    | No diabetes | Male   | 40   | -    | -        | -         | 9        | CD8                | Head, Tail       | Negative            | Ins+ islets, reduced numbers.                                                                                                                                                      |
| 6096    | No diabetes | Female | 16   | -    | -        | 2.97      | 4        | CD8                | Head, Body, Tail | Negative            | Ins+ normal islets. Very mild, multifocal chronic pancreatitis.                                                                                                                    |
| 6098    | No diabetes | Male   | 17.8 | 22.8 | -        | 1.41      | 1        | CD8, CD4, CD11c    | Head             | Negative            | Normal islets, few with vascular stasis.                                                                                                                                           |

SUPPLEMENTARY DATA

| nPOD ID | Donor Type  | Gender | Age  | BMI  | Duration | C-Peptide | Time ICU | Cell type analyzed | Regions analyzed | Clinical History           | Histopathology by nPOD                                                                                                                     |
|---------|-------------|--------|------|------|----------|-----------|----------|--------------------|------------------|----------------------------|--------------------------------------------------------------------------------------------------------------------------------------------|
| 6099    | No diabetes | Male   | 14.2 | 30   | -        | 5.37      | 2        | CD8                | Head             | Negative                   | Normal islets. Mild, CD3+ pancreatitis.                                                                                                    |
| 6104    | No diabetes | Male   | 41   | 20.5 | -        | 20.55     | 3        | CD8, CD4, CD11c    | Body             | Negative                   | Ins+/Gluc+ islets. Mild adipose infiltration exocrine regions.                                                                             |
| 6134    | No diabetes | Male   | 26.7 | 20.1 | -        | 3.59      | 2        | CD8, CD4, CD11c    | Head, Body, Tail | Negative                   | Ins+ islets plentiful.                                                                                                                     |
| 6137    | No diabetes | Female | 8.9  | 24.2 | -        | 12.13     | 3        | CD8, CD4, CD11c    | Body             | Negative                   | Ins+ islets. Mild fatty infiltrate. No inflammatory infiltrates.                                                                           |
| 6144    | No diabetes | Female | 7.5  | 16.3 | -        | 1.27      | 23       | CD8, CD4, CD11c    | Head, Tail       | Negative                   | Ins+/Gluc+ islets, normal.                                                                                                                 |
| 6153    | No diabetes | Male   | 15.2 | 20.5 | -        | 8.38      | -        | CD8, CD4, CD11c    | Body             | Negative                   | Ins+/Gluc+ islets, numerous. Insulin intensity weak. Autolysis in head and body regions. No infiltrates islets or exocrine.                |
| 6160    | No diabetes | Male   | 22.1 | 23.9 | -        | 0.4       | 2        | CD8, CD4, CD11c    | Body             | Negative                   | Ins+/Gluc+ islets present, all sizes. No infiltrates.                                                                                      |
| 6165    | No diabetes | Female | 45.8 | 25   | -        | 4.45      | 4        | CD8, CD4, CD11c    | Head,Body        | Negative                   | Ins+/Gluc+ numerous islets, normal sizes. No infiltrates. Mild acinar fat.                                                                 |
| 6026    | T1D         | Male   | 22.4 | 24.1 | 14       | <0.05     | -        | CD8                | Head, Tail       | Retinopathy and neuropathy | Ins- islets. Mild to moderate atrophy.                                                                                                     |
| 6031    | T1D         | Male   | 39   | 24.5 | 35       | <0.05     | 1        | CD8, CD4, CD11c    | Head             | mIAA+                      | Ins- islets. Moderate atrophy islets and acinar regions. Moderate to severe (focally) chronic pancreatitis, fibrosis.                      |
| 6038    | T1D         | Female | 37.2 | 30.9 | 20       | 0.2       | 6        | CD8, CD4, CD11c    | Head             | Hypertension               | Ins+/Gluc+ islets. No infiltrates. Mild to moderate acinar atrophy and fatty infiltration.                                                 |
| 6039    | T1D         | Female | 28.7 | 23.4 | 12       | <0.05     | 4        | CD8, CD4, CD11c    | Head             | GADA+ IA-2A+ ZnT8A+ mIAA+  | Ins-/Gluc +. Islet atrophy. Possible insulinitis diffuse-mild peri and intra-islet CD3+.                                                   |
| 6045    | T1D         | Male   | 26.4 | 23.1 | 8        | <0.05     | 11       | CD8                | Tail             | ZnT8A+ mIAA+               | Ins-/Gluc+ islets, numerous; Mild, multifocal infiltrates, intra and extra acinar; diffuse, mild acinar atrophy.                           |
| 6054    | T1D         | Female | 35   | 30.4 | 30       | <0.05     | 2        | CD8                | Tail             | mIAA+                      | Ins- islets, islet number decreased. Chronic pancreatitis, mild, multifocal infiltrates (some CD3+) with mild periductal fibrosis.         |
| 6061    | T1D         | Male   | 28   | 22.1 | 23       | <0.05     | 10       | CD8                | Head, Body, Tail | mIAA+                      | Ins-/Gluc+ islets with no infiltrates. Periductal fibrosis.                                                                                |
| 6062    | T1D         | Male   | 10.7 | 21.9 | 6        | -         | 5        | CD8                | Head, Body, Tail | No serum                   | Ins- islets. Insulinitis and also CD3+ infiltrates primarily acinar region and parenchyma (focal). Acinar atrophy and periductal fibrosis. |
| 6063    | T1D         | Male   | 4.4  | 23.8 | 3        | <0.05     | 1        | CD8                | Head, Body, Tail | Plasma available, no serum | Ins- islets. Islets w/ possible insulinitis. Infrequent CD3+ acinar infiltrates.                                                           |
| 6064    | T1D         | Female | 19.6 | 22.6 | 10       | <0.05     | 3        | CD8                | Body, Tail       | GADA+ IA-2A+ ZnT8A+        | Ins- islets. Acute pancreatitis (PMN).                                                                                                     |
| 6067    | T1D         | Female | 32.6 | 26.8 | 8        | <0.05     | 4        | CD8                | Head, Body, Tail | Negative                   | Ins- islets. Mild chronic pancreatitis.                                                                                                    |
| 6069    | T1D         | Male   | 22.9 | 28.8 | 7        | -         | 10       | CD8                | Body, Tail       | No serum available         | Ins+ islets. Acinar atrophy and fibrosis. CD3+ mild, diffuse acinar regions.                                                               |
| 6076    | T1D         | Male   | 25.8 | 18.8 | 15       | <0.05     | 7        | CD8                | Head, Body, Tail | GADA+ mIAA+                | Ins- islets. Rare insulinitis. CD3+ cells indicative of mild, diffuse chronic pancreatitis. Mild to moderate atrophy and fibrosis.         |
| 6077    | T1D         | Female | 32.9 | 22   | 19       | <0.05     | 3        | CD8                | Head, Body, Tail | mIAA+                      | Ins- islets. Multifocal, mild CD3+ acinar and peri-ductal infiltrates. Multifocal, moderate acinar atrophy.                                |
| 6081    | T1D         | Male   | 31.4 | 28   | 15       | 0.24      | 8        | CD8, CD4, CD11c    | Body, Tail       | Negative                   | Ins+ islets. Mild to moderate chronic pancreatitis.                                                                                        |

## SUPPLEMENTARY DATA

| nPOD ID | Donor Type | Gender | Age  | BMI  | Duration | C-Peptide | Time ICU | Cell type analyzed | Regions analyzed | Clinical History                                                                        | Histopathology by nPOD                                                                                                                                                                                                                                                        |
|---------|------------|--------|------|------|----------|-----------|----------|--------------------|------------------|-----------------------------------------------------------------------------------------|-------------------------------------------------------------------------------------------------------------------------------------------------------------------------------------------------------------------------------------------------------------------------------|
| 6083    | T1D        | Female | 15.2 | 18.4 | 11       | <0.05     | 2        | CD8                | Head             | mIAA+                                                                                   | Ins- islets. Islet atrophy severe; acute necrotizing pancreatitis.                                                                                                                                                                                                            |
| 6084    | T1D        | Male   | 14.2 | 26.3 | 4        | <0.05     | 3        | CD8, CD4, CD11c    | Body, Tail       | mIAA+                                                                                   | Ins+ islets by nPOD, Ins- in our lab. Lobular adipose infiltration. No infiltrates.                                                                                                                                                                                           |
| 6087    | T1D        | Male   | 17.5 | 21.9 | 4        | <0.05     | 2        | CD8                | Head, Body, Tail | ZnT8A+ mIAA+. GI resection, cataracts, glaucoma, hypertension, congestive heart failure | Ins-/Gluc+. Mild, focal islet infiltrates some are CD3+ while others CD3 negative. No pancreatitis or exocrine atrophy.                                                                                                                                                       |
| 6088    | T1D        | Male   | 31.2 | 27   | 5        | <0.05     | 1        | CD8                | Head, Body, Tail | GADA+ IA-2A+ ZnT8A+ mIAA+                                                               | Ins+/Gluc+ islets by nPOD, Ins- in our lab. Insulinitis. Chronic pancreatitis mild, CD3+, periductular. Acinar atrophy moderate, with mild fibrosis and fatty infiltration.                                                                                                   |
| 6113    | T1D        | Female | 13.1 | -    | 1        | -         | 5        | CD8, CD4, CD11c    | Body             | mIAA+                                                                                   | Ins+ (reduced)/Gluc+ islets. Insulinitis. Lobular islet heterogeneity. Islet atrophy with mild acinar atrophy (heterogeneous).                                                                                                                                                |
| 6119    | T1D        | Male   | 27.8 | 19.4 | 14       | <0.05     | 3        | CD8                | Body             | GADA+ mIAA+. Concurrent autoimmune diseases                                             | Ins-/Gluc+ reduced numbers with atrophy including acinar. Mild, multifocal acinar infiltrates, mostly CD3+ and peri-vascular.                                                                                                                                                 |
| 6143    | T1D        | Female | 32.6 | 26.1 | 7        | <0.05     | 4        | CD8                | Body             | IA-2A+ mIAA+                                                                            | Ins-/Gluc+ islets, atrophic. No infiltrates.                                                                                                                                                                                                                                  |
| 6152    | T1D        | Female | 29.6 | 30.1 | 12       | <0.05     | 11       | CD8                | Head, Body, Tail | ZnT8A+. History of multiple episodes of DKA                                             | Ins-/Gluc+ islets. Severe exocrine atrophy secondary to moderate chronic pancreatitis.                                                                                                                                                                                        |
| 6180    | T1D        | Male   | 27.1 | 25.9 | 11       | <0.05     | 6        | CD8, CD4, CD11c    | Tail             | GADA+ IA-2A+ ZnT8A+ mIAA+                                                               | Ins-/Gluc+, rare Ins+ islet (Tail). Islet and acinar atrophy, moderate to focally severe. Acinar region has mild diffuse CD3+.                                                                                                                                                |
| 6195    | T1D        | Male   | 19.2 | 23.7 | 5        | <0.05     | 1        | CD8, CD4, CD11c    | Head             | GADA+ IA-2A+ ZnT8A+ mIAA+                                                               | Ins+ (rare)/Gluc+ islets. Insulinitis present small number of islets. Mostly small Gluc+ only islets (pseudotrophic islets) with single alpha cells. Moderate acinar atrophy with chronic pancreatitis, multifocal, mild.                                                     |
| 6198    | T1D        | Female | 22   | 23.1 | 3        | <0.05     | 21       | CD8, CD4, CD11c    | Tail             | GADA+ IA-2A+ ZnT8A+ mIAA+                                                               | Ins+/Gluc+ islets. Diffuse mild insulinitis (increase in CD3+ cells/islet rather than focal aggregates). Mild diffuse chronic pancreatitis. Mild acinar atrophy and ductular proliferation.                                                                                   |
| 6209    | T1D        | Female | 5    | -    | 0.25     | 0.1       | -        | CD8, CD4, CD11c    | Head             | IA-2A+ ZnT8A+ mIAA+                                                                     | Ins+ (reduced)/Gluc+ islets with insulinitis. No pancreatitis. Moderate autolysis.                                                                                                                                                                                            |
| 6211    | T1D        | Female | 24   | 24.4 | 4        | <0.05     | 7        | CD8, CD4, CD11c    | Body             | GADA+ IA-2A+ ZnT8A+ mIAA+                                                               | Ins+(reduced)/Gluc+ islets, numerous. Very mild chronic pancreatitis, infrequent, lobular.                                                                                                                                                                                    |
| 6212    | T1D        | Male   | 20   | 29.1 | 5        | <0.05     | 4        | CD8, CD11c         | Head             | mIAA+                                                                                   | Ins+(reduced)/Gluc+ islets. Insulinitis- 1-2 islets, mild (>6 CD3+ cells).                                                                                                                                                                                                    |
| 6224    | T1D        | Female | 21   | 22.8 | 1.5      | <0.05     | -        | CD8, CD4, CD11c    | Body             | Negative. DKA. Diagnosed with T1D during pregnancy                                      | Ins+ (reduced numbers and intensity)/Gluc+ islets with occasional insulinitis (body, tail). Focal acute pancreatitis.                                                                                                                                                         |
| 6228    | T1D        | Male   | 13   | 17.4 | 0        | 0.1       | -        | CD8, CD4, CD11c    | Head             | GADA+ IA-2A+ ZnT8+                                                                      | Ins+/Gluc+ Islets of various morphologies including normal appearing, fibrotic, degenerating, and with insulinitis. Some pseudotrophic (glucagon+ only) islets. Very mild, multifocal exocrine atrophy. Very mild, multifocal mononuclear infiltrates (chronic pancreatitis). |

## SUPPLEMENTARY DATA

| nPOD ID | Donor Type | Gender | Age  | BMI  | Duration | C-Peptide | Time ICU | Cell type analyzed | Regions analyzed | Clinical History                                       | Histopathology by nPOD                                                                                                                  |
|---------|------------|--------|------|------|----------|-----------|----------|--------------------|------------------|--------------------------------------------------------|-----------------------------------------------------------------------------------------------------------------------------------------|
| 6028    | T2D        | Male   | 33.2 | 30.2 | 17       | 22.4      | 3        | CD8                | Head             | Hypertension, high cholesterol, endstage renal disease | Ins+ islets, variable intensity, most islets positive. Very mild, diffuse CD3+ acinar infiltrates.                                      |
| 6059    | T2D        | Female | 18.8 | 39.1 | 0.25     | 10.68     | 4        | CD8                | Tail             | DKA 3 months prior with acute renal failure            | Ins+ islets. CD3+ foci intra-acinar and periductular. Mild acinar atrophy and pancreatic adipose tissue.                                |
| 6110    | T2D        | Female | 20.7 | 40   | 0        | 0.58      | 8        | CD8, CD4, CD11c    | Tail             | Gestational diabetes in past, Father had diabetes      | Ins+ (reduced)/Gluc+ islets. No infiltrates except one small foci.                                                                      |
| 6127    | T2D        | Female | 44.8 | 30.4 | 10       | 0.08      | 2        | CD8, CD11c         | Head, Body, Tail | mIAA+                                                  | Ins+ (reduced)/Gluc+ islets. Mild adiposity exocrine regions.                                                                           |
| 6139    | T2D        | Female | 37.2 | 45.4 | 1.5      | 0.6       | 4        | CD8, CD4, CD11c    | Head, Body       | Mother had T2D                                         | Ins+ islets, plentiful with nuclear polymorphism. Minimal fibrosis. No pancreatitis.                                                    |
| 6142    | T2D        | Female | 29.8 | 34.4 | 14       | 0.19      | 4        | CD8, CD11c         | Head, Body, Tail | mIAA+                                                  | Ins+ islets (reduced). Multifocal, mild amyloid. Moderate acinar atrophy, fibrosis, and ductular dysplasia.                             |
| 6149    | T2D        | Female | 39.3 | 29.1 | 16       | 11.55     | 3        | CD8, CD4, CD11c    | Head, Body, Tail | GADA+. History of gestational diabetes                 | Ins+/Gluc+ islets numerous, some hypertrophied. Moderate acinar atrophy. Periductal and acinar infiltrates, mild.                       |
| 6176    | T2D        | Male   | 45.1 | 25.3 | 20       | -         | 9        | CD8, CD4, CD11c    | Head, Body, Tail | Negative for GADA and IA2A. DKA at admission           | Ins+ (weak)/Gluc+ islets, numerous but small sized. Mild acinar atrophy.                                                                |
| 6185    | T2D        | Male   | 46   | 41.4 | 15       | 26.42     | 3        | CD8                | Body             | Negative                                               | Ins+/Gluc+ (greatly elevated)                                                                                                           |
| 6188    | T2D        | Male   | 36.1 | 30.6 | 0        | 3.45      | 4        | CD8, CD4, CD11c    | Body, Tail       | Negative                                               | Ins+/Gluc+ islets. No infiltrates or amyloid observed.                                                                                  |
| 6189    | T2D        | Female | 48.5 | 36.1 | 26       | 1.85      | 7        | CD8, CD4, CD11c    | Body             | mIAA+                                                  | Ins+/Gluc+ numerous islets. Rare amyloid in islets. Very mild chronic pancreatitis with occasional exocrine atrophy, fatty replacement. |
